# Supplementary material for: Hemolymph Ecdysteroid Titer Affects Maternal mRNAs during Bombyx mori Oogenesis
Source: MDPI journal article supplement (doi:10.3390/insects12110969), 2021-10-27
Supplement: s1 [file s1]

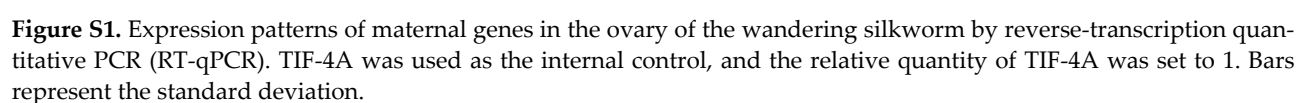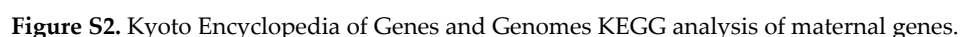

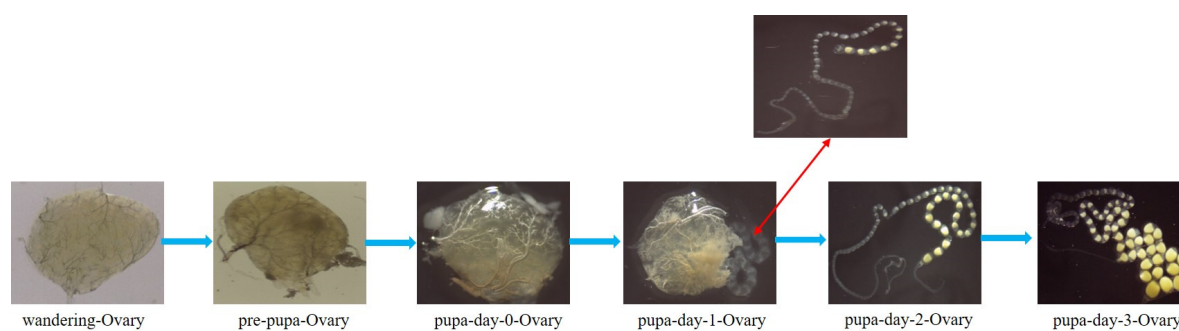

**Figure S3.** View of the ovary or ovariole of the silkworm from the wandering larvae to day-3 pupae.

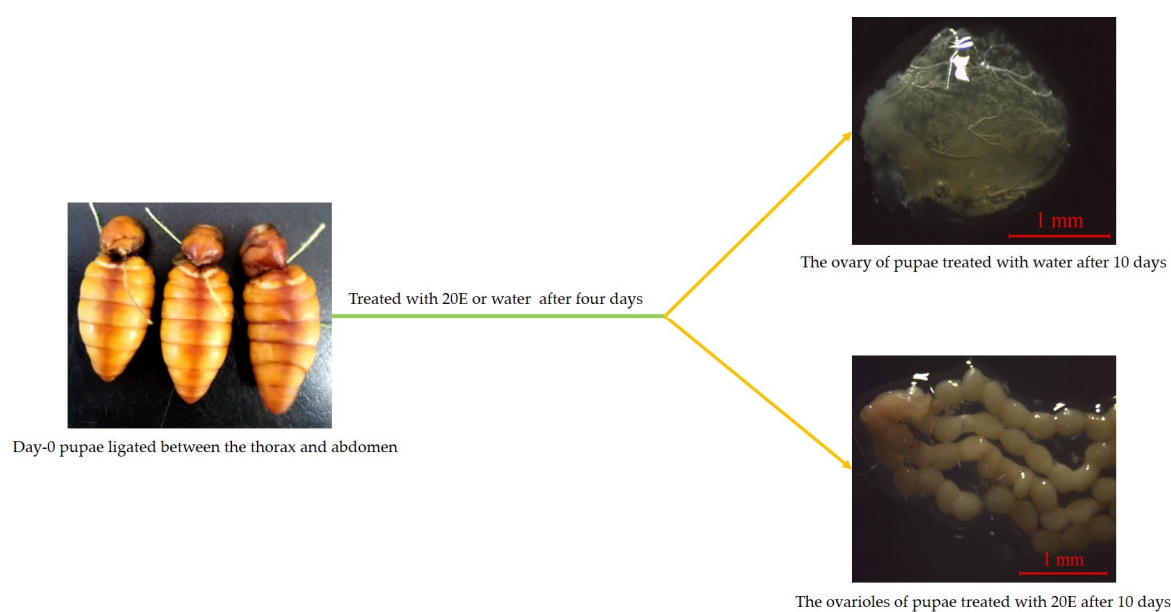

**Figure S4.** View of the 20E-depleted abdomens and the ovary or ovariole of the 20E-depleted abdomens injected with 5  $\mu\text{L}$  of a 20E (10.0  $\mu\text{g}$  solution or 5  $\mu\text{L}$  of sterile distilled water.
